# Supplementary material
Source: PubMed Central journal article supplement (PMC6445387)
Supplement: NIHMS908133-supplement-etable.pdf [file NIHMS908133-supplement-etable.pdf]

## Supplementary Online Content

Jensen EA, DeMauro SB, Kornhauser M, Aghai ZH, Greenspan JS, Dysart KC. Effects of multiple ventilation courses and duration of mechanical ventilation on respiratory outcomes in extremely low-birth-weight infants. *JAMA Pediatr*. Published online September 28, 2015. doi:10.1001/jamapediatrics.2015.2401.

**eTable.** Characteristics of All Infants Based on the Cumulative Duration of Mechanical Ventilation and the Number of Mechanical Ventilation Courses

This supplementary material has been provided by the authors to give readers additional information about their work.

**eTable.** Characteristics of All Infants Based on the Cumulative Duration of Mechanical Ventilation and the Number of Mechanical Ventilation Courses

| <b>Characteristic</b>                            | <b>≤ 7 days</b><br>No.=936  | <b>8-21 days</b><br>No.=678 | <b>22-35 days</b><br>No.=442 | <b>≥ 36 days</b><br>No.=1287  |
|--------------------------------------------------|-----------------------------|-----------------------------|------------------------------|-------------------------------|
| <i>Demographics</i>                              |                             |                             |                              |                               |
| Gestational age, median (IQR), weeks             | 27 (25.9-28.3)              | 26.3 (25.3-27.4)            | 25.7 (24.9-26.7)             | 25 (24.1-26)                  |
| Birth weight, median (IQR), g                    | 848 (720-930)               | 800 (680-890)               | 771 (665-880)                | 690 (600-790)                 |
| Male, No. (%)                                    | 421 (45.0)                  | 342 (50.4)                  | 226 (51.1)                   | 689 (53.5)                    |
| SGA, No. (%)                                     | 323 (34.5)                  | 171 (25.2)                  | 102 (23.1)                   | 335 (26.0)                    |
| 5 minute Apgar score, median (IQR)               | 8 (6-8)                     | 7 (6-8)                     | 7 (6-8)                      | 7 (6-8)                       |
| <i>Treatments/Morbidities</i>                    |                             |                             |                              |                               |
| Surfactant, No. (%)                              | 665 (71.1)                  | 491 (72.4)                  | 339 (76.6)                   | 1011 (78.6)                   |
| PDA Treatment, No. (%)                           | 339 (36.2)                  | 349 (51.5)                  | 277 (62.7)                   | 885 (68.8)                    |
| NEC, No. (%)                                     | 36 (3.9)                    | 60 (8.9)                    | 30 (6.8)                     | 175 (13.6)                    |
| Bacterial sepsis, No. (%)                        | 184 (19.7)                  | 240 (35.4)                  | 193 (43.7)                   | 773 (60.1)                    |
| Postnatal dexamethasone treatment, No. (%)       | 42 (4.5)                    | 86 (12.7)                   | 81 (18.3)                    | 577 (44.8)                    |
| Mechanical ventilation duration, median (IQR), d | 3 (2-5)                     | 14 (10-18)                  | 29 (25-32)                   | 59 (46-82)                    |
| Mechanical ventilation courses, median (IQR)     | 1 (1)                       | 2 (1-3)                     | 3 (2-4)                      | 4 (3-6)                       |
| <b>Characteristic</b>                            | <b>1 course</b><br>No.=1083 | <b>2 courses</b><br>No.=729 | <b>3 courses</b><br>No.=573  | <b>≥ 4 courses</b><br>No.=958 |
| <i>Demographics</i>                              |                             |                             |                              |                               |
| Gestational age, median (IQR), weeks             | 26.7 (25.4-28)              | 26 (25-27)                  | 25.7 (24.7-26.9)             | 25 (24.1-26.1)                |
| Birth weight, median (IQR), g                    | 824 (700-920)               | 800 (670-887)               | 745 (645-860)                | 690 (600-801)                 |
| Male, No. (%)                                    | 486 (44.9)                  | 367 (50.3)                  | 293 (51.1)                   | 532 (55.5)                    |
| SGA, No. (%)                                     | 359 (33.2)                  | 174 (23.9)                  | 132 (23.0)                   | 266 (27.8)                    |
| 5 minute Apgar score, median (IQR)               | 8 (6-8)                     | 7 (6-8)                     | 7 (6-8)                      | 7 (6-8)                       |
| <i>Treatments/Morbidities</i>                    |                             |                             |                              |                               |
| Surfactant, No. (%)                              | 747 (69)                    | 542 (74.4)                  | 460 (80.3)                   | 757 (79.0)                    |
| PDA Treatment, No. (%)                           | 443 (40.9)                  | 391 (53.6)                  | 357 (62.3)                   | 659 (68.8)                    |
| NEC, No. (%)                                     | 36 (3.3)                    | 61 (8.4)                    | 50 (8.7)                     | 154 (16.1)                    |
| Bacterial sepsis, No. (%)                        | 238 (22.0)                  | 277 (38.0)                  | 272 (47.5)                   | 603 (62.9)                    |
| Postnatal dexamethasone treatment, No. (%)       | 80 (7.4)                    | 127 (17.4)                  | 150 (26.2)                   | 429 (44.8)                    |
| Mechanical ventilation duration, median (IQR), d | 4 (2-11)                    | 17 (8-35)                   | 32 (17-53)                   | 59 (39-88)                    |
| Mechanical ventilation courses, median (IQR)     | 1 (1)                       | 2 (2)                       | 3 (3)                        | 5 (4-6)                       |

BPD, bronchopulmonary dysplasia; IQR, inter-quartile range; NEC, necrotizing enterocolitis; PDA, patent ductus arteriosus; SGA, small for gestational age.

Differences between ventilation courses and ventilation duration categories for all patient characteristics are statistically significant with a  $p < 0.001$ .
